# Supplementary material for: Cyclopropenium Nanoparticles and Gene Transfection in Cells
Source: Pharmaceutics. 2020 Aug 13;12(8):768. doi: 10.3390/pharmaceutics12080768 (PMC7465078; doi:10.3390/pharmaceutics12080768)
Supplement: Supplementary file 1 [file pharmaceutics-12-00768-s001.pdf]

# Supplementary Materials: Cyclopropenium Nanoparticles and Gene Transfection in Cells

Noam Y. Steinman, Luis M. Campos, Yakai Feng, Abraham J. Domb and Hossein Hosseinkhani

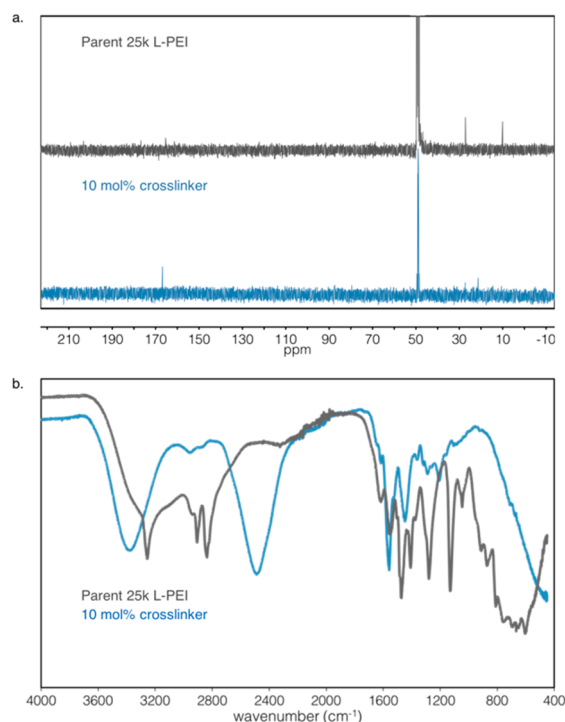

**Figure S1.**  $^{13}\text{C}$  NMR (a) and IR (b) spectra of parent linear PEI compared to those of a crosslinked polymer. The appearance of aromatic carbon peaks (a) and disappearance of secondary amine absorbances (b) suggests in situ cyclopropenium ion formation and crosslinking with secondary amines.

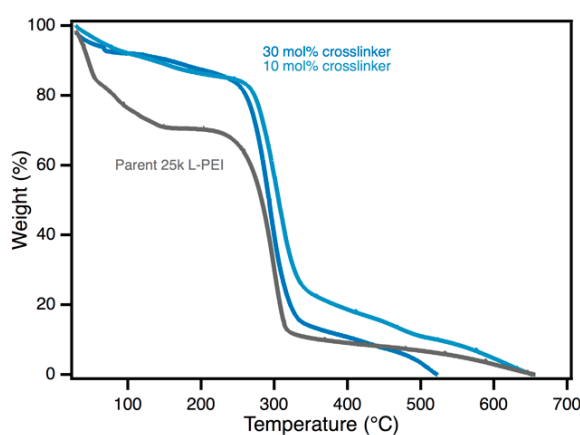

**Figure S2.** Thermal gravimetric analysis of crosslinked polymers. Cyclopropenium crosslinking of 25k L-PEI L-PEI provides enhanced stability below 300  $^{\circ}\text{C}$ . Crosslinking minimally changes thermal decomposition temperature. There is no change in thermal decomposition with increased crosslinking density.
